# Supplementary material
Source: HighWire-hosted journal article supplement (http://jpet.aspetjournals.org/highwire/filestream/135633/field_highwire_adjunct_files/0/JPET184796_Table_1.pdf)
Supplement: JPET184796_Table_1.pdf [file JPET184796_Table_1.pdf]

JPET #184796

**Supplemental data**

**Glucocorticoids Improve Renal Responsiveness to ANP by Upregulating NPR-A Expression  
in the Renal Inner Medullary Collecting Duct in Decompensated Heart Failure**

Chao Liu, Ying Chen, Yunxiao Kang, Zhihua Ni, Heming Xiu, Jing Guan, Kunshen Liu

**The Journal of Pharmacology and Experimental Therapeutics**

**Supplemental Table 1. Characteristic data of rats with sham operation (SO) and rats with congestive heart failure (CHF)**

| Rats | Infarct size (%) | LVEDP (mmHg) | HR (beat/min) | MAP (mmHg) | Plasma ANP (pg/ml) | Urinary volume (ml/24h) | Urinary sodium (mmol/24h) | NPR-A expression in inner renal medulla (% of SO) |
|------|------------------|--------------|---------------|------------|--------------------|-------------------------|---------------------------|---------------------------------------------------|
| SO   | 0                | 4.4 ± 1.7    | 393 ± 17      | 107 ± 6.7  | 125 ± 31           | 10.9 ± 1.2              | 2.0 ± 0.3                 | 100 ± 13.0                                        |
| CHF  | 42 ± 6**         | 25.8 ± 7.8** | 414 ± 23*     | 89 ± 8.7** | 1731 ± 761**       | 7.1 ± 0.2**             | 1.4 ± 0.2**               | 79.5 ± 12.1*                                      |

Data are expressed as mean ± standard deviation. n= 7 in each group. \*P<0.05 CHF versus SO group; \*\*P<0.01 CHF versus SO group. LVEDP, left ventricle end diastolic pressure; HR, heart rate; MAP, mean arterial pressure; ANP, atrial natriuretic peptide; NPR-A, natriuretic peptide receptor-A. NPR-A expression was assessed by western blotting analysis and expressed as a relative value compared with average expression in the rats with SO.
